# Supplementary material for: Efficacy and tolerability of adjunctive lacosamide in patients aged <4 years with focal seizures
Source: PubMed Central journal article supplement (PMC10963285; doi:10.1002/acn3.52004), 2024-02-20
Supplement: ACN3-11-768-s001.pdf [file ACN3-11-768-s001.pdf]

## Supplementary Materials

### **eMethods**

#### *Additional Exclusion Criteria*

Patients were excluded if they were on a ketogenic diet that had either changed within the previous 4 weeks or was expected to change during the trial; creatinine clearance of <30 mL/minute; clinically relevant electrocardiogram abnormality; hemodynamically significant congenital heart disease; arrhythmic heart condition requiring medical therapy; history of severe anaphylactic reaction secondary to medication intake or serious blood dyscrasias; nonepileptic events that could be confused with seizures; serious toxicity issues while on felbamate treatment or felbamate treatment for <12 months; acute or subacutely progressive central nervous system disease, or epilepsy secondary to a progressive cerebral or neurodegenerative disease; or cardiac sodium channelopathy.

#### *Protocol Amendments*

The inclusion and exclusion criteria described in this manuscript reflect those used in the last version of the trial protocol. During the conduct of the trial, certain criteria were removed or adjusted in protocol amendments to provide additional clarity, make the protocol more patient-friendly, and enhance enrollment. All protocol amendments were implemented before unblinding. Important amendments included the following:

- Removal of the inclusion criterion requiring patients to have uncontrolled focal seizures after an adequate course of treatment with  $\geq 2$  antiseizure medications (ASMs). The criterion was removed because there was another inclusion criterion that targeted the population of interest with regard to concomitant ASMs, and because requiring patients to fail  $\geq 2$  ASMs was an impediment to recruiting younger patients.
- Change of the duration of video-electroencephalograms (video-EEGs) from 72 hours of continuous recording to  $\leq 72$  hours of continuous recording, with every attempt to obtain  $\geq 48$  hours of interpretable recording. The rationale was that completion of a full 72-hour EEG was an impediment to patient enrollment.

- Removal of the central video-EEG reader, which was applied to address the high variability in video-EEG seizure counts between the central reader and local investigators (Bozorg A et al, 2024).

#### *Randomization of Patients*

An interactive voice/web response system (IXRS) was used to assign a treatment to eligible patients, based on a predetermined randomization schedule provided by UCB Pharma or its designee. Patients, investigators, and all site personnel were blinded to trial medication. To enroll a patient (visit 1), the investigator contacted the IXRS. Each patient was assigned a number at screening that served as the patient identifier throughout the trial. To randomize a patient (visit 3), the investigator (or designee) contacted the IXRS. The IXRS allocated kit numbers to the patient (based on the patient number) during the course of the trial. The blind was maintained, as all patient treatment details were allocated and maintained by the IXRS and the accompanying packaging for lacosamide and placebo was identical in appearance.

#### *Sample Size Re-estimation*

The sample size re-estimation with equal allocation in each arm was performed using the related residual variance combined with Guenther adjustment (Friede and Kieser, 2011). An assessment of the observed dropout rate was also made as part of this analysis, and the potential dropout rate of 14% used for calculation of the initial sample size was modified based on the observed rate. Additionally, an assessment of the observed difference of end-of-baseline (EOB) video-EEG interpretation rate was made; the anticipated rate of 5% was modified based on the observed rate.

The final sample size, the anticipated dropout rate, and the anticipated rate of difference of interpretation of the EOB video-EEG was to be modified according to the sample size re-estimate; however, an upper bound was applied to reach a maximum sample size based on practical and logistical considerations. The initial sample size re-estimate using Guenther

adjustment was not to be adjusted above 109 patients per treatment arm, the original estimated overall trial dropout rate was not to be adjusted above 24%, and the difference of EOB video-EEG interpretation rate was not to be adjusted above 10%.

#### *Criteria for Patient Withdrawal From the Trial*

Patients must have been withdrawn from the trial if any of the following events occurred:

- The patient experienced intolerable adverse events that, in the investigator's opinion, precluded further participation in the trial. Patients who were unable to tolerate the trial medication (unable to achieve or maintain the target dose for the final 3 days of the titration period) also had to be withdrawn from the trial.
- The sponsor or a regulatory agency requested withdrawal of the patient.
- The patient had QTc interval  $\geq 500$  ms, confirmed by a cardiologist over-read on any electrocardiogram.
- The patient developed a second- or third-degree atrioventricular block.
- The patient was unwilling or unable to continue, or the parent(s)/legal representative(s)/caregiver(s) was/were unwilling or unable to allow the patient to continue in the trial.
- Investigator's decision that withdrawal from further participation would be in the patient's best interest.
- The patient experienced generalized convulsive status epilepticus.

Patients may have been withdrawn from the trial if any of the following events occurred:

- The patient had any clinically relevant change in medical or psychiatric condition and, in the investigator's opinion, the condition warranted discontinuation from the trial.
- The patient required a medication not permitted by the protocol.
- The patient's legal representative(s)/caregiver(s) (in accordance with local regulation) was/were noncompliant with trial procedures or medication, in the investigator's opinion.

- The patient used benzodiazepine within 24 hours before or during video-EEG for any reason other than a stable daily dosage regimen as a concomitant ASM.

Additional discontinuation criteria for potential drug-induced liver injury (PDILI):

- Patients with PDILI were assessed to determine if the trial medication was to be discontinued.
- All concomitant medications and herbal supplements that were not medically necessary were also to be discontinued.
- The following PDILI criteria required immediate and permanent discontinuation of trial medication:
  - Patients with either of the following:
    - Alanine aminotransferase (ALT) or aspartate aminotransferase (AST)  $\geq 5 \times$  upper limit of normal (ULN)
    - ALT or AST  $\geq 3 \times$  ULN and coexisting total bilirubin  $\geq 2 \times$  ULN
- The following PDILI criteria required immediate discontinuation of trial medication:
  - Patients with ALT or AST  $\geq 3 \times$  ULN who exhibited temporally associated symptoms of hepatitis or hypersensitivity.
- The following PDILI criteria allowed patients to continue on trial medication, at the investigator's discretion:
  - Patients with ALT or AST  $\geq 3 \times$  ULN (and  $\geq 2 \times$  baseline) and  $< 5 \times$  ULN, total bilirubin  $< 2 \times$  ULN, and no eosinophilia (i.e.,  $\leq 5\%$ ), with no fever, rash, or symptoms of hepatitis.

#### *Collection of Adverse Event Data*

All adverse events (AEs) that occurred during the study (i.e., after the signing of the informed consent form) were reported in the electronic case report form, even if no investigational product was taken but specific study procedures were conducted. This included all AEs not present before the initial visit and all AEs that recurred or worsened after the initial visit. Signs

or symptoms of the condition for which the investigational product was being studied were recorded as AEs only if their nature changed considerably or their frequency or intensity increased in a clinically significant manner compared with the clinical profile known to the investigator from the study participant's history or the baseline period.

An increase in the intensity of an AE led to the repetition of the AE being reported with either the outcome date of the first AE that was not related to the natural course of the disease being the same as the start date of the repeated AE, and the outcome of "worsening"; or the AE verbatim term being the same for the first and repeated AEs, so that the repeated AE could be easily identified as the worsening of the first one.

The relatedness of AEs was assessed by the investigators. The intensity of AEs was graded as mild, moderate, or severe based on the grades defined in Common Terminology Criteria for Adverse Events v5.0 (grade 1: mild; asymptomatic or mild symptoms; clinical or diagnostic observations only; or intervention not indicated; grade 2: moderate; minimal, local, or noninvasive intervention indicated; or limiting age-appropriate instrumental activities of daily living; grade 3: severe or medically significant but not immediately life-threatening; hospitalization or prolongation of hospitalization indicated; disabling; or limiting self-care activities of daily living; grade 4: life-threatening consequences or urgent intervention indicated; grade 5: death related to AE). Life-threatening and death due to AE was used additionally.

## **References**

Bozorg A, Beller C, Jensen L, et al. Pitfalls of using video-EEG for a trial endpoint in children aged <4 years with focal seizures. *ACN3*. 2024;11:780-790.

Friede T, Kieser M. Blinded sample size recalculation for clinical trials with normal data and baseline adjusted analysis. *Pharm Stat*. 2011;10:8-13.

**eFIGURE 1: Clinical Global Impression of Change (A) and Caregiver’s Global Impression of Change (B) at EOM (Full Analysis Set).**

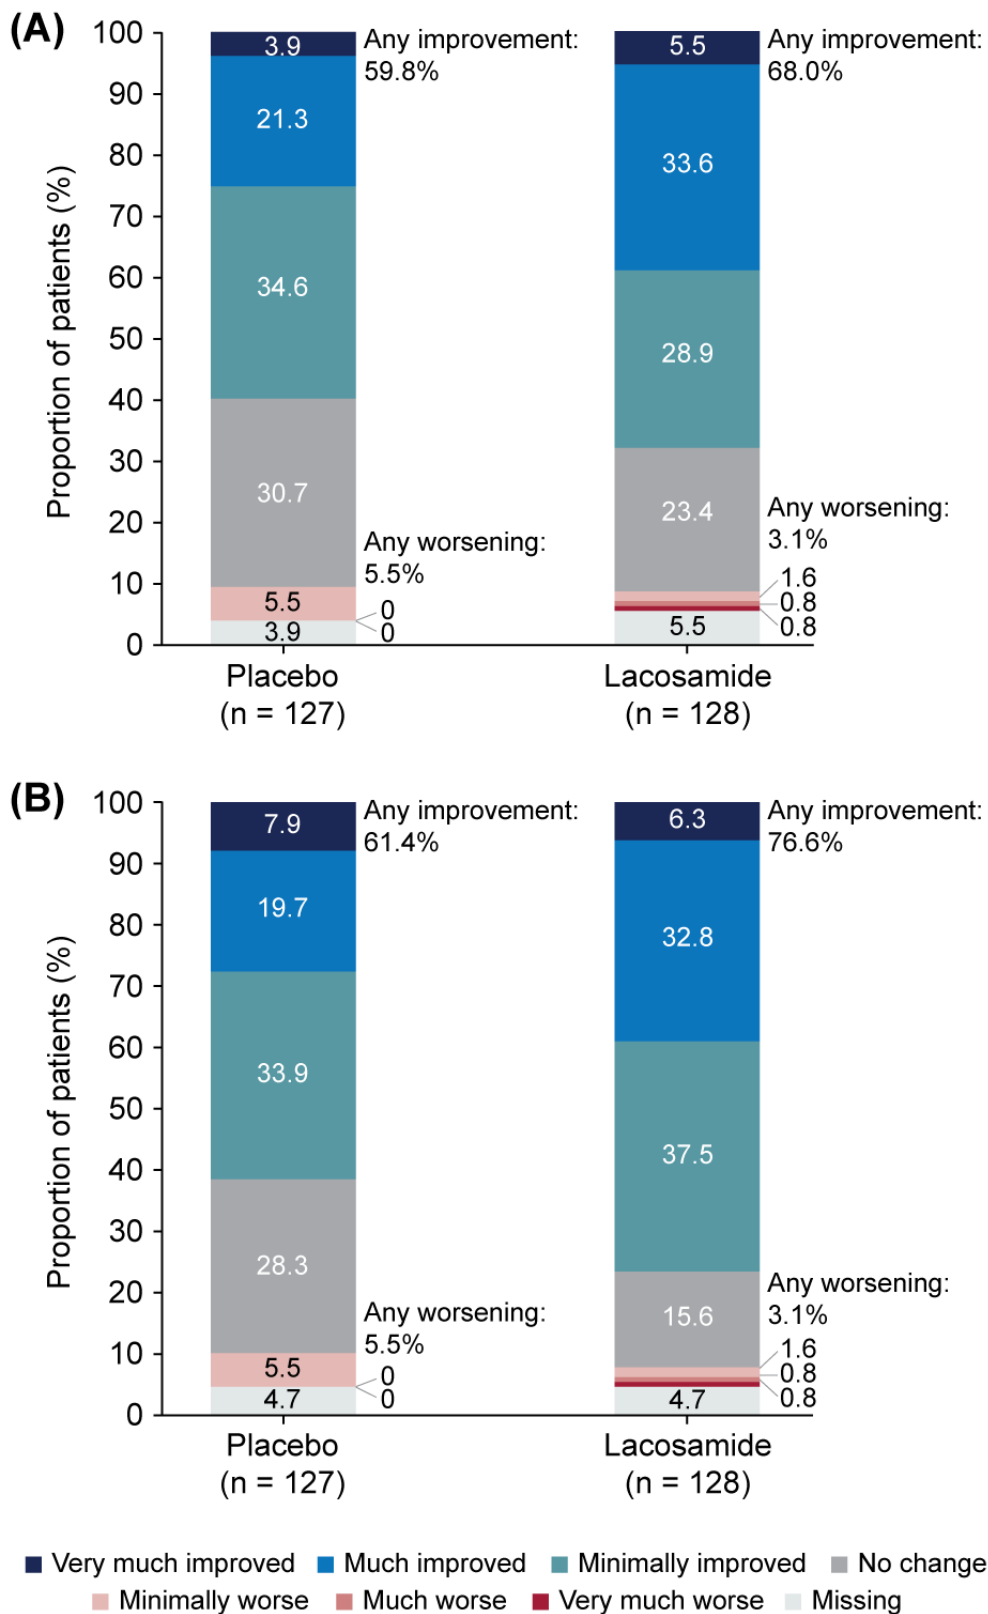

Abbreviations: EOM = end-of-maintenance period.

**eTABLE 1. Change From Baseline to EOM in PedsQL Subscale Scores and Total Score for Patients Aged 2–4 Years (Full Analysis Set)**

|                                          | Observed value at baseline |                        | Change from baseline to the end of the maintenance period |                        |
|------------------------------------------|----------------------------|------------------------|-----------------------------------------------------------|------------------------|
|                                          | Placebo<br>(n = 68)        | Lacosamide<br>(n = 66) | Placebo<br>(n = 68)                                       | Lacosamide<br>(n = 66) |
| <b>Physical functioning</b>              |                            |                        |                                                           |                        |
| n                                        | 67                         | 65                     | 64                                                        | 63                     |
| Mean (SD)                                | 54.9 (33.7)                | 52.7 (32.2)            | -0.8 (18.0)                                               | 2.7 (15.8)             |
| <b>Emotional functioning</b>             |                            |                        |                                                           |                        |
| n                                        | 67                         | 65                     | 64                                                        | 62                     |
| Mean (SD)                                | 68.5 (22.7)                | 63.4 (23.2)            | 1.3 (19.4)                                                | 3.4 (16.7)             |
| <b>Social functioning</b>                |                            |                        |                                                           |                        |
| n                                        | 66                         | 65                     | 63                                                        | 62                     |
| Mean (SD)                                | 59.1 (31.6)                | 60.2 (32.0)            | 0.7 (23.3)                                                | 2.0 (22.2)             |
| <b>School functioning</b>                |                            |                        |                                                           |                        |
| n                                        | 30                         | 37                     | 27                                                        | 30                     |
| Mean (SD)                                | 66.9 (30.3)                | 51.6 (33.7)            | 0.3 (22.9)                                                | 4.2 (27.9)             |
| <b>Psychosocial health summary score</b> |                            |                        |                                                           |                        |
| n                                        | 66                         | 65                     | 63                                                        | 61                     |
| Mean (SD)                                | 63.8 (21.9)                | 60.3 (23.9)            | 1.1 (15.3)                                                | 3.2 (15.1)             |
| <b>Physical health summary score</b>     |                            |                        |                                                           |                        |
| n                                        | 67                         | 65                     | 64                                                        | 63                     |
| Mean (SD)                                | 54.9 (33.7)                | 52.7 (32.2)            | -0.8 (18.0)                                               | 2.7 (15.8)             |
| <b>Total score</b>                       |                            |                        |                                                           |                        |
| n                                        | 67                         | 65                     | 64                                                        | 62                     |
| Mean (SD)                                | 59.5 (24.8)                | 57.0 (25.1)            | 0.3 (12.7)                                                | 2.7 (14.2)             |

Abbreviations: EOM = end-of-maintenance period; PedsQL = Pediatric Quality of Life Inventory; SD = standard deviation.

## Appendix 1

### Investigators

| <b>Name</b>                                             | <b>Location</b>                                                                                                                                    | <b>Role</b>       | <b>Contribution</b> |
|---------------------------------------------------------|----------------------------------------------------------------------------------------------------------------------------------------------------|-------------------|---------------------|
| <b>Dr Conceição Campanário da Silva Pereira Almeida</b> | Hospital Infantil Sabará, São Paulo, Brazil                                                                                                        | Site Investigator | Data acquisition    |
| <b>Dr Anna Altmann</b>                                  | Servus Salvus Egészségügyi Szolgáltató Kft, Budapest, Hungary                                                                                      | Site Investigator | Data acquisition    |
| <b>Dr Elena Arefieva</b>                                | State Autonomous Healthcare Institution of the Kemerovo Region<br>“Kemerovo Regional Clinical Hospital named after S.V. Belyaev”, Kemerovo, Russia | Site Investigator | Data acquisition    |
| <b>Dr Susan Arnold</b>                                  | Children’s Medical Center Dallas, Dallas, TX, USA                                                                                                  | Site Investigator | Data acquisition    |
| <b>Dr Mihaela Axente</b>                                | Centrul National Clinic De Recuperare Neuropsihomotorie pentru Copii - Dr N. Robanescu, Bucharest, Romania                                         | Site Investigator | Data acquisition    |
| <b>Dr Maria Giuseppina Baglietto</b>                    | IRCCS Istituto Giannina Gaslini, Unitá Operativa di Neuropsichiatria Infantile, Genova, Italy                                                      | Site Investigator | Data acquisition    |
| <b>Prof. Sophio Bakhtadze</b>                           | Tbilisi State Medical University, G. Zhvania Academic Clinic of Pediatrics, Tbilisi, Georgia                                                       | Site Investigator | Data acquisition    |



|                                           |                                                                                                                                                  |                   |                  |
|-------------------------------------------|--------------------------------------------------------------------------------------------------------------------------------------------------|-------------------|------------------|
| <b>Dr Domenica Immacolata Battaglia</b>   | Fondazione Policlinico Universitario Agostino Gemelli, UOC Neuropsichiatria Infantile, Rome, Italy                                               | Site Investigator | Data acquisition |
| <b>Prof. Liudmila Belova</b>              | State Health Institution "Central Clinical Medical Sanitary Department named after the Honored Doctor of Russia V.A. Egorova", Ulianovsk, Russia | Site Investigator | Data acquisition |
| <b>Dr Marianne Berényi</b>                | Szent Margit Kórház, Fejlődésneurológiai Osztály, Budapest, Hungary                                                                              | Site Investigator | Data acquisition |
| <b>Dr Cornelia Calcii</b>                 | Institutia Medico-Sanitara Publica (IMSP), Institutul Mamei si Copilului, Sectia Neurologie si Epileptologie, Chisinau, Moldova                  | Site Investigator | Data acquisition |
| <b>Dr Dezhi Cao</b>                       | Shenzhen Children's Hospital, Department of Pediatric Neurology, Shenzhen, China                                                                 | Site Investigator | Data acquisition |
| <b>Dr Juan Fernando Capristo Gonzales</b> | Centenario Hospital Miguel Hidalgo, Aguascalientes, Mexico                                                                                       | Site Investigator | Data acquisition |
| <b>Dr Hugo Ceja Moreno</b>                | Antiguo Hospital Civil de Guadalajara Fray Antonio Alcalde, Hospital n° 278, Tercer Piso Neuropediatría, Colonia El Retiro, Guadalajara, Mexico  | Site Investigator | Data acquisition |
| <b>Assoc. Prof. Yuriy Chomolyak</b>       | Regional Clinical Centre of Neurosurgery and Neurology, Uzhgorod, Ukraine                                                                        | Site Investigator | Data acquisition |

|                                          |                                                                                                                                                                  |                   |                  |
|------------------------------------------|------------------------------------------------------------------------------------------------------------------------------------------------------------------|-------------------|------------------|
| <b>Dr Jo Janette De la Calzada</b>       | Cebu Doctors' University Hospital,<br>Cebu City, Philippines                                                                                                     | Site Investigator | Data acquisition |
| <b>Dr Anne de Saint Martin</b>           | Centre Hospitalier Universitaire de<br>Strasbourg-Hôpital Hautepierre,<br>Service de Pédiatrie 1, Centre<br>Réfèrent des Épilepsies Rares,<br>Strasbourg, France | Site Investigator | Data acquisition |
| <b>Dr Dmytro Delva</b>                   | Ivano-Frankivsk Regional Children's<br>Clinical Hospital, Ivano-Frankivsk,<br>Ukraine                                                                            | Site Investigator | Data acquisition |
| <b>Dr Tayard Desudchit</b>               | King Chulalongkorn Memorial Hospital,<br>Department of Pediatrics,<br>Chulalongkorn University, Bangkok,<br>Thailand                                             | Site Investigator | Data acquisition |
| <b>Dr Gabriella Di Rosa</b>              | Azienda Ospedaliera Universitaria<br>Policlinico G. Martino, UOC<br>Neuropsichiatria Infantile, Messina,<br>Italy                                                | Site Investigator | Data acquisition |
| <b>Assist. Prof. Argirios Dinopoulos</b> | University General Hospital of Attikon,<br>Third University Pediatric Department,<br>Haidari, Greece                                                             | Site Investigator | Data acquisition |
| <b>Dr Milda Endziniene</b>               | Hospital of Lithuanian University of<br>Health Sciences Kaunas Clinics,<br>Neurology Clinic, Department of<br>Children's Neurology, Kaunas,<br>Lithuania         | Site Investigator | Data acquisition |
| <b>Dr Viktor Farkas</b>                  | Semmelweis Egyetem, I. Sz.<br>Gyermekegyógyászati Klinika,                                                                                                       | Site Investigator | Data acquisition |

|                                             |                                                                                                                                            |                   |                  |
|---------------------------------------------|--------------------------------------------------------------------------------------------------------------------------------------------|-------------------|------------------|
|                                             | Csecsemő - és Gyermekneurológiai<br>Osztály, Budapest, Hungary                                                                             |                   |                  |
| <b>Dr Jose Ferreira</b>                     | Pediatric Epilepsy and Neurology<br>Specialists, Tampa, FL, USA                                                                            | Site Investigator | Data acquisition |
| <b>Dr José Carlos<br/>Ferreira</b>          | Centro Hospitalar de Lisboa Ocidental<br>- Hospital S. Francisco Xavier,<br>Gabinete de Neurologia Pediátrica,<br>Lisbon, Portugal         | Site Investigator | Data acquisition |
| <b>Dr András Fogarasi</b>                   | Magyarországi Református Egyház<br>Bethesda Gyermekkörháza,<br>Neurológia, Budapest, Hungary                                               | Site Investigator | Data acquisition |
| <b>Dr Cassiano<br/>Mateus Forcelini</b>     | Hospital São Vicente de Paulo, Unidade<br>de Pesquisa Clínica HSVP, Passo<br>Fundo, Brazil                                                 | Site Investigator | Data acquisition |
| <b>Prof. Hadassa<br/>Goldberg-Stern</b>     | Schneider Children's Medical Center of<br>Israel, Institute of Pediatric Neurology -<br>Epilepsy Center, Petah Tikva, Israel               | Site Investigator | Data acquisition |
| <b>Dr Tiziana Granata</b>                   | Istituto Neurologico 'C. Besta',<br>Fondazione IRCCS Istituto<br>Neurologico Carlo Besta, U.O.<br>Neuropsichiatria Infantile, Milan, Italy | Site Investigator | Data acquisition |
| <b>Dr Ioana Grigore</b>                     | Spitalul Clinic de Urgenta pentru Copii<br>Sfanta Maria Iasi, Clinica Neurologie<br>Pediatrica, Iasi, Romania                              | Site Investigator | Data acquisition |
| <b>Dr Christian Paul<br/>Guzman Astorga</b> | Hospital General de Culiacán Dr<br>Bernardo J. Gastelum, Culiacán,<br>Mexico                                                               | Site Investigator | Data acquisition |

|                                       |                                                                                                                                         |                   |                  |
|---------------------------------------|-----------------------------------------------------------------------------------------------------------------------------------------|-------------------|------------------|
| <b>Dr Jose Antonio Infante Cantu</b>  | Hospital Universitario Dr José Eleuterio González, Monterrey, Mexico                                                                    | Site Investigator | Data acquisition |
| <b>Dr Li Jiang</b>                    | Children’s Hospital of Chongqing Medical University, Department of Neurology, Chongqing, China                                          | Site Investigator | Data acquisition |
| <b>Dr Yuwu Jiang</b>                  | Peking University First Hospital, Department of Pediatric Neurology, Beijing, China                                                     | Site Investigator | Data acquisition |
| <b>Dr Pongkiat Kankirawatana</b>      | Children’s Hospital of Alabama, Division of Pediatric Neurology, Birmingham, AL, USA                                                    | Site Investigator | Data acquisition |
| <b>Prof. Yulia Karakulova</b>         | FSBEI HE “Perm State Medical University named after Academician E.A. Wagner Ministry of Health of the Russian Federation”, Perm, Russia | Site Investigator | Data acquisition |
| <b>Prof. Olga Khaletskaya</b>         | Limited Liability Company “Nizhmedklinika”, Nizhny Novgorod, Russia                                                                     | Site Investigator | Data acquisition |
| <b>Dr Volodymyr Kharytonov</b>        | Territorial Medical Association “Psychiatry”, Kiev, Ukraine                                                                             | Site Investigator | Data acquisition |
| <b>Prof. Heung Dong Kim</b>           | Severance Hospital, Yonsei University Health System, Seoul, South Korea                                                                 | Site Investigator | Data acquisition |
| <b>Prof. Ki Joong Kim</b>             | Seoul National University Hospital, Seoul, South Korea                                                                                  | Site Investigator | Data acquisition |
| <b>Prof. Marija Knezevic Pogancev</b> | Institute for Child and Youth Health Care of Vojvodina, Department for Developmental Neurology and Epileptology, Novi Sad, Serbia       | Site Investigator | Data acquisition |

|                                        |                                                                                                                                                                               |                   |                  |
|----------------------------------------|-------------------------------------------------------------------------------------------------------------------------------------------------------------------------------|-------------------|------------------|
| <b>Dr Liudmila Kraeva</b>              | Federal State Budgetary Educational Institution of Higher Education<br>“Siberian State Medical University of the Ministry of Health of the Russian Federation”, Tomsk, Russia | Site Investigator | Data acquisition |
| <b>Assist. Prof. Ruzica Kravljanac</b> | Institute for Mother and Child health Care of Serbia Dr Vukan Cupic, Child Neurology Service, Belgrade, Serbia                                                                | Site Investigator | Data acquisition |
| <b>Dr David Kvernadze</b>              | Institute of Neurology and Neuropsychology, Tbilisi, Georgia                                                                                                                  | Site Investigator | Data acquisition |
| <b>Dr Alla Kyrychenko</b>              | Municipal Institution “Dnipropetrovsk Regional Clinical Children’s Hospital”, Dnipro, Ukraine                                                                                 | Site Investigator | Data acquisition |
| <b>Dr Volodymyr Kyrychenko</b>         | Municipal Institution “Vinnytsya Regional Psychoneurological Hospital named after academician O.I. Iuschenko”, Vinnytsya, Ukraine                                             | Site Investigator | Data acquisition |
| <b>Dr Wang-Tso Lee</b>                 | National Taiwan University Hospital, Taipei, Taiwan                                                                                                                           | Site Investigator | Data acquisition |
| <b>Dr Jianmin Liang</b>                | The First Hospital of Jilin University, Department of Pediatric Neurology, Changchun City, China                                                                              | Site Investigator | Data acquisition |
| <b>Dr Elmer Guillermo López-Meza</b>   | Neurociencias Estudios Clínicos, Culiacán, Mexico                                                                                                                             | Site Investigator | Data acquisition |
| <b>Dr Marissa Lukban</b>               | Manila Doctors Hospital, Clinical Trial Office, Manila, Philippines                                                                                                           | Site Investigator | Data acquisition |

|                                       |                                                                                                                                      |                   |                  |
|---------------------------------------|--------------------------------------------------------------------------------------------------------------------------------------|-------------------|------------------|
| <b>Dr Olga Lvova</b>                  | Municipal Autonomous Institution<br>“Children's City Clinical Hospital No.<br>9”, Ekaterinburg, Russia                               | Site Investigator | Data acquisition |
| <b>Assist. Prof. Maša Malenica</b>    | Klinicki Bolnicki Centar “Sestre<br>milosrdnice”, Zagreb, Croatia                                                                    | Site Investigator | Data acquisition |
| <b>Dr Maria Margherita Mancardi</b>   | IRCCS Istituto Giannina Gaslini, Unitá<br>Operativa di Neuropsichiatria Infantile,<br>Genova, Italy                                  | Site Investigator | Data acquisition |
| <b>Dr Volodymyr Martyniuk</b>         | Ukrainian Medical Rehabilitation<br>Centre for Children with Organic<br>Disorders of NS, MoH of Ukraine, Kiev,<br>Ukraine            | Site Investigator | Data acquisition |
| <b>Prof. Gia Melikishvili</b>         | MediClub Georgia, Tbilisi, Georgia                                                                                                   | Site Investigator | Data acquisition |
| <b>Dr Richard Morse</b>               | Dartmouth-Hitchcock Medical Center,<br>Pediatric Neurology, Lebanon, NH,<br>USA                                                      | Site Investigator | Data acquisition |
| <b>Dr Sylvia Napuri</b>               | Centre Hospitalier Universitaire de<br>Rennes-Hôpital Sud, Département de<br>Médecine de l'enfant et l'adolescent,<br>Rennes, France | Site Investigator | Data acquisition |
| <b>Assoc. Prof. Dimitrije Nikolic</b> | University Children's Hospital,<br>Neurology Service, Belgrade, Serbia                                                               | Site Investigator | Data acquisition |
| <b>Prof. Vilem Novak</b>              | Fakultní nemocnice Ostrava, Oddelení<br>Detské Neurologie, Ostrava-Poruba,<br>Czech Republic                                         | Site Investigator | Data acquisition |

|                                           |                                                                                                                                                                                      |                   |                  |
|-------------------------------------------|--------------------------------------------------------------------------------------------------------------------------------------------------------------------------------------|-------------------|------------------|
| <b>Dr Liliana Maria Nussbaum</b>          | Spitalul Clinic de Urgenta pentru Copii Louis Turcanu, Centrul de Sanatate Mintala pentru Copii si Adolescenti, Timis, Romania                                                       | Site Investigator | Data acquisition |
| <b>Dr Claudio Palacios</b>                | Sanatorio Allende, Córdoba, Argentina                                                                                                                                                | Site Investigator | Data acquisition |
| <b>Prof. Pavel Pilipenko</b>              | State Budgetary Institution of Healthcare of the Novosibirsk Region "State Novosibirsk Regional Clinical Hospital", Novosibirsk, Russia                                              | Site Investigator | Data acquisition |
| <b>Dr Barbara Prawdzic-Senkowska</b>      | Wojewódzki Specjalistyczny Szpital Dzieciocy im. sw. Ludwika sw Krakowie, Oddział Dzieci Starszych z Pododdziałem Neurologicznym, Reumatologicznym, Rehabilitacyjnym, Kraków, Poland | Site Investigator | Data acquisition |
| <b>Prof. Igor Prpic</b>                   | Klinicki Bolnicki Centar Rijeka (Clinical Hospital Centre Rijeka), Rijeka, Croatia                                                                                                   | Site Investigator | Data acquisition |
| <b>Dr Roshan Raja</b>                     | Child Neurology Specialists, Henderson, NV, USA                                                                                                                                      | Site Investigator | Data acquisition |
| <b>Dr Olga Shestakova</b>                 | Limited Liability Company "Multi-field Center of Modern Medicine Euromed", Omsk, Russia                                                                                              | Site Investigator | Data acquisition |
| <b>Dr Maria Strachunskaya</b>             | Regional State Budgetary Institution of Health "Smolensk Regional Clinical Hospital", Smolensk, Russia                                                                               | Site Investigator | Data acquisition |
| <b>Dr Roberto Alfonso Suástegui Román</b> | Human Science Research Trials, Mexico City, Mexico                                                                                                                                   | Site Investigator | Data acquisition |

---

|                                        |                                                                                                                              |                   |                  |
|----------------------------------------|------------------------------------------------------------------------------------------------------------------------------|-------------------|------------------|
| <b>Prof. Nino Tatishvili</b>           | EVEX Hospitals M. Iashvili Children's<br>Central Hospital, Tbilisi, Georgia                                                  | Site Investigator | Data acquisition |
| <b>Dr Salvador<br/>Vázquez Fuentes</b> | Hospital Universitario Dr José<br>Eleuterio González, Monterrey, Mexico                                                      | Site Investigator | Data acquisition |
| <b>Prof. Federico<br/>Vigevano</b>     | Ospedale Pediatrico Bambino Gesù,<br>Unità Operativa di Neurologia, Rome,<br>Italy                                           | Site Investigator | Data acquisition |
| <b>Dr Gabriela Adriana<br/>Visa</b>    | Spitalul Clinic de Pediatrie Sibiu,<br>Sectia de Pediatrie II, Compartimentul<br>de Neurologie Pediatrica, Sibiu,<br>Romania | Site Investigator | Data acquisition |
| <b>Dr Yi Wang</b>                      | Children's Hospital of Fudan<br>University, Department of Pediatric<br>Neurology, Shanghai, China                            | Site Investigator | Data acquisition |
| <b>Dr Elza Márcia<br/>Yacubian</b>     | Universidade Federal de São Paulo<br>MD, São Paulo, Brazil                                                                   | Site Investigator | Data acquisition |
| <b>Dr Jianmin Zhong</b>                | Jiangxi Provincial Children's Hospital,<br>Department of Neurology, Nanchang,<br>China                                       | Site Investigator | Data acquisition |

---
